# Supplementary material for: The small RNA diversity from Medicago truncatula roots under biotic interactions evidences the environmental plasticity of the miRNAome
Source: Genome Biol. 2014 Sep 24;15(9):457. doi: 10.1186/s13059-014-0457-4 (PMC4212123; doi:10.1186/s13059-014-0457-4)

**Additional file 1: Supplementary figures.**

**Figure S1: Accumulation of conserved and novel miRNAs**

Accumulation of known miRNAs, new variants of already reported miRNA families and novel miRNAs was confirmed by qRT-PCR experiments performed in roots and root tips (a), roots inoculated with *S. meliloti* Sm1021 (b), with *R. solanacearum* (c) or *V. album* (d). To represent small RNA levels, Ct or delta Ct related to snU6 are given (b, c and d). In a) transcript levels in root tips were normalized with roots. (d) Accumulation of known miRNAs, new variants of already reported miRNA families and novel miRNAs in roots inoculated with *V. albo-atrum*. Error bars represent standard deviations. (\*) indicates new variants of already reported miRNA families; miR8 to 27 (a), miR-I to III and miR-A to N represent novel miRNAs (see primers in (Additional file 12: Table S10).

**Figure S2: Complexity of mtr-miRNA gene families**

(a) Distribution of miRNA families according to their gene number. (b) Distribution of miRNA families according to their number of variants. Particular miRNAs mentioned in results are shown in boxes.

**Figure S3: Distribution of the wide-spread miRNA class in the Eudicots, Angiosperms and other plants**

Numbers represent the total number of miRNAs in each category. Boxes are proportional to the percentage of miRNAs in each category.

**Figure S4 : Comparisons of the levels of polymorphisms of precursors and mature miRNAs from conserved miRNAs, that are encoded by multiple (>2) or simple (<=2) locus.**

No significant differences ( $p=0.16$ ) exist for precursor polymorphisms levels among the two precursor classes.

**Figure S5: Pie charts of the functional annotation (Gene Ontology) distribution of miRNA targets**

Pie charts of (a) conserved miRNA targets; (b) legume miRNA targets and; (c) novel miRNA targets. Each color represents a different functional category and numbers represent the target number belonging to the corresponding category. Targets were predicted as described in methods.

**Figure S6: Venn diagrams of the miRNA expression distribution in leaves versus roots grown under different conditions**

Venn diagrams of (a) all root libraries vs. leaves; (b) all root libraries vs. root apexes. Numbers on each region of the Venn diagram area represent the amount of miRNA differentially present in each of the different comparisons between conditions or organs. miRNAs were declared differential if adjusted p-value was less than  $1.10^{-3}$  (false discovery rate, Benjamini-Hochberg). R.i.: *Rhizophagus irregularis*; S.m.: *Sinorhizobium meliloti*; Dis.: control library of *Ralstonia solanacearum* and *Verticillium albo-atrum* conditions.

**Figure S7: Venn diagrams of the miRNA expression distribution in roots treated with symbiotic signals (Nod and Myc LCOs)**

Venn diagrams for (a) known and (b) novel miRNAs. Treatments with Myc-LCOs (Myc) or Nod Factors (Nod) and miRNAs down-regulated (Down) or up-regulated (Up) are indicated. Numbers on each region of the Venn diagram area represent the amount of miRNA differentially present in each of the different comparisons between conditions. miRNAs were declared differential if adjusted treatment p-value was less than 0.05 (false discovery rate, Benjamini-Hochberg).

**Figure S8: Venn diagrams of the comparison of miRNAs differentially expressed between symbiotic microbes, symbiotic-related signals and respective control roots**

Venn diagrams corresponding to (a) nodulation-related libraries and (b) mycorrhization-related libraries. R.i.: *Rhizophagus irregularis*; S.m.: *Sinorhizobium meliloti*. Myc: Myc-LOCs. Nod: Nod factors. Root development: control roots for each symbiotic interaction. Numbers on each region of the Venn diagram area represent the amount of miRNA differentially present in each of the different comparisons between conditions. miRNAs were declared differential if adjusted treatment p-value was less than  $1.10^{-3}$  (false discovery rate, Benjamini-Hochberg).

**Figure S9: WGCNA co-expression network of miRNAs in response to root symbionts and pathogens.**

(a) Different colors (blue, green and orange) are associated to each regulatory module identified by the WGCNA analysis. Smallest nodes are miRNAs non-responsive to the inoculation with the microbes. Biggest nodes are miRNAs responsive to one or more microbes. The shape of the node indicates differential expression patterns: (○) miRNAs responsive to symbionts, (◇) miRNAs responsive to pathogens, (□) miRNAs responsive to both symbionts and pathogens. Names for miRNAs already described in miRBase V20 or new putative variants of known miRNA families (-like) are labelled. Nodes without any label correspond to new miRNA identified in this study.

(b) Biological processes associated to the three regulatory modules of miR co-expression networks as inferred by the analysis of the GO terms of the predicted targets per module. Each radar-plot depicts the repartition of the different biological processes (%) for each of the 3 modules of the network (i.e. blue, green and orange). Each branch in the radar-plots corresponds to the same biological process.

**(a)**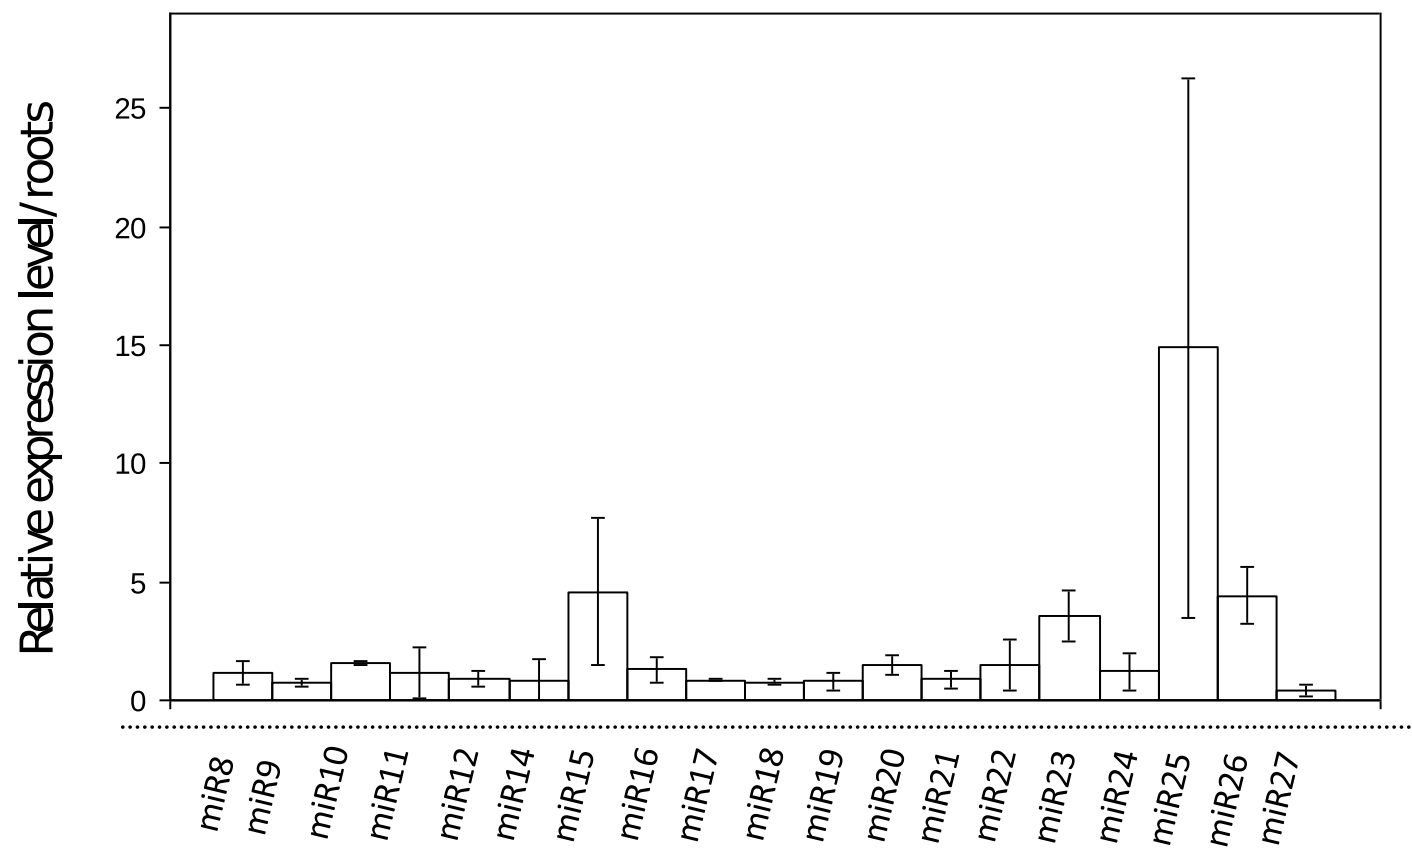**(b)**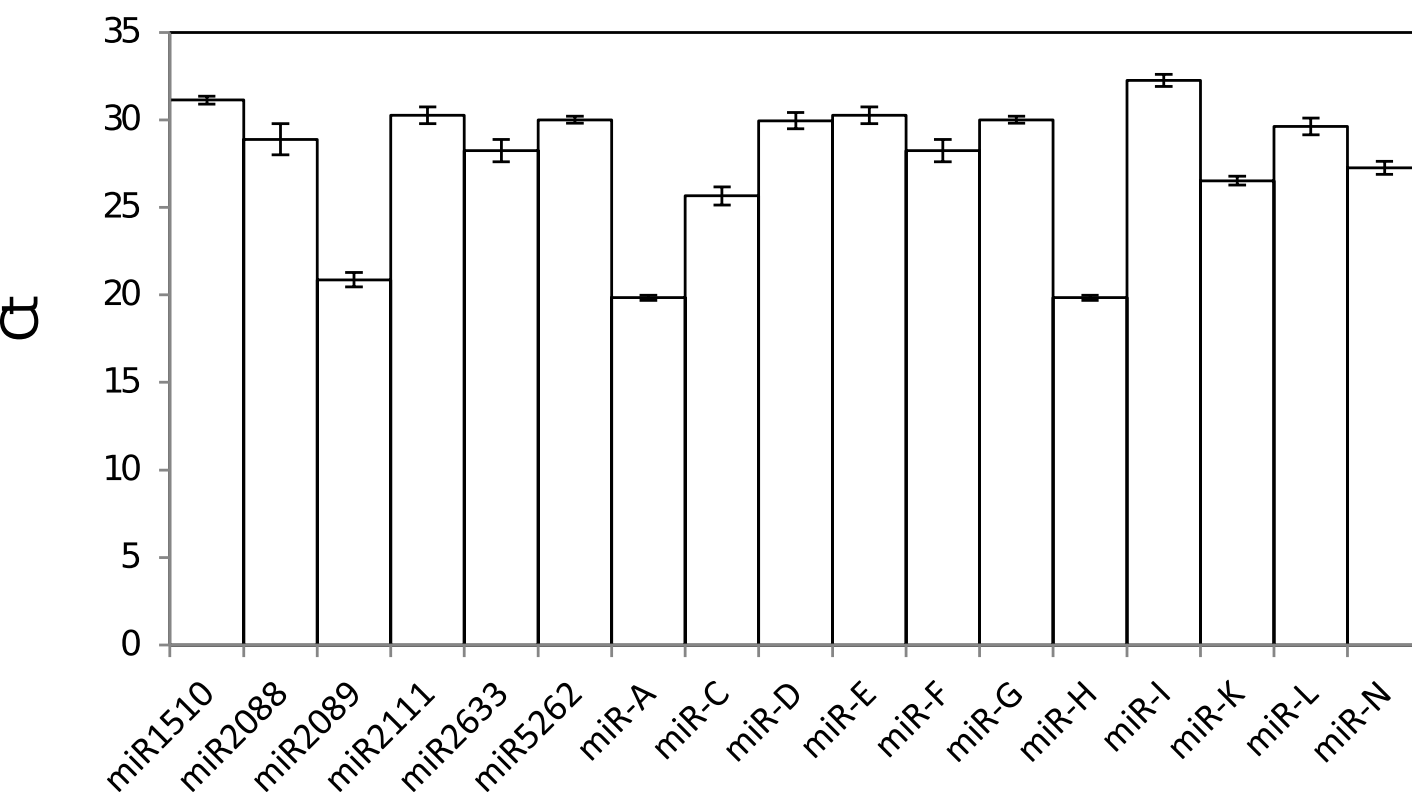**(c)**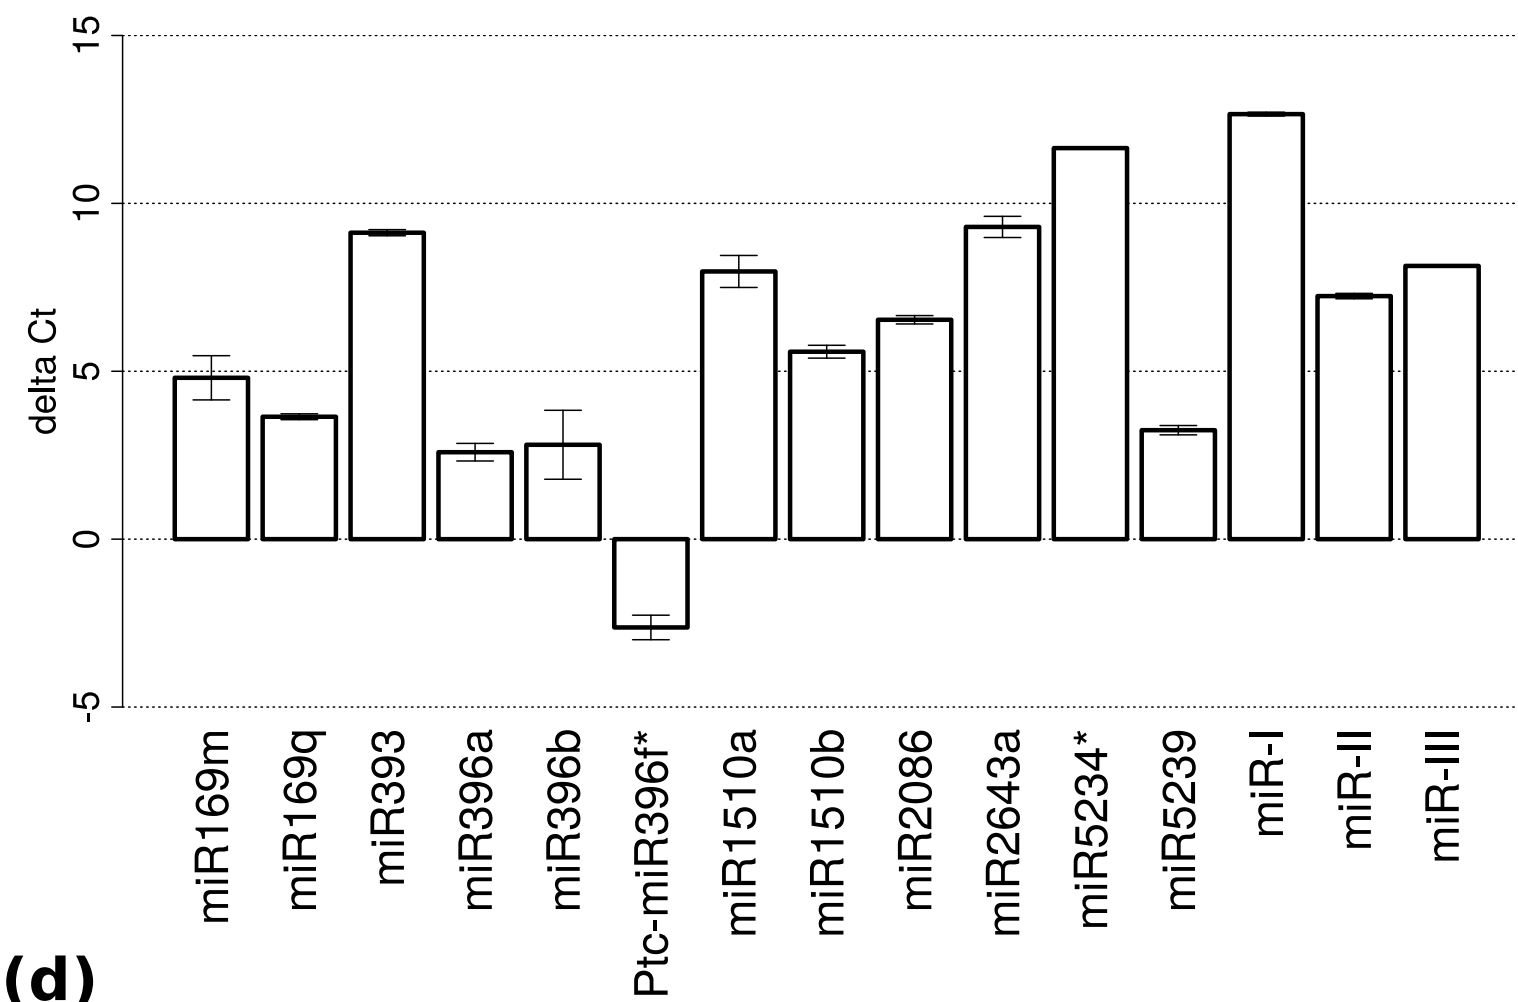**(d)**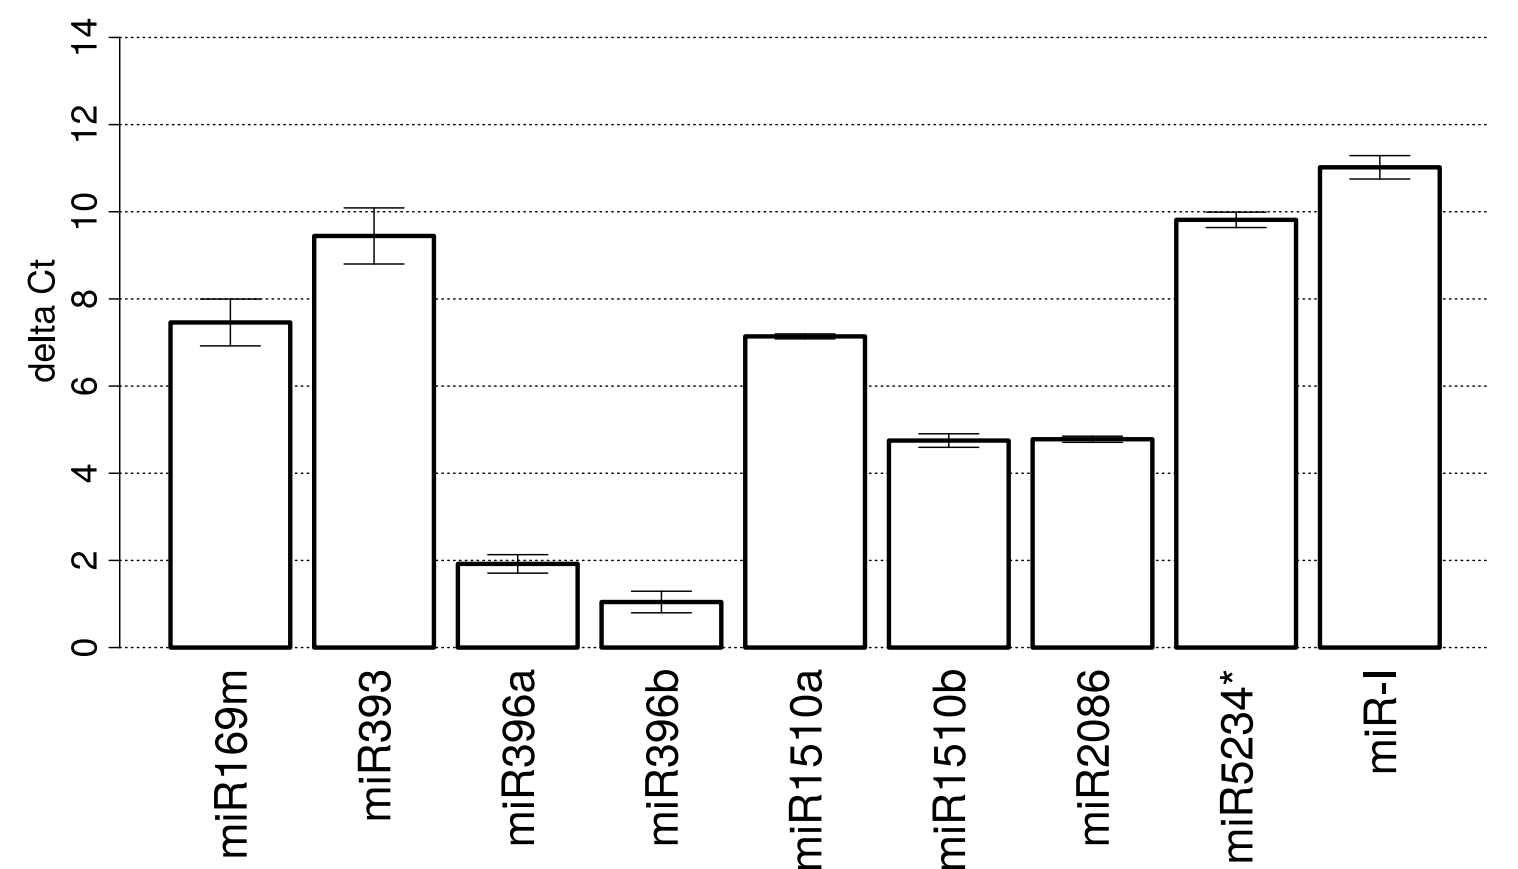

Figure S2

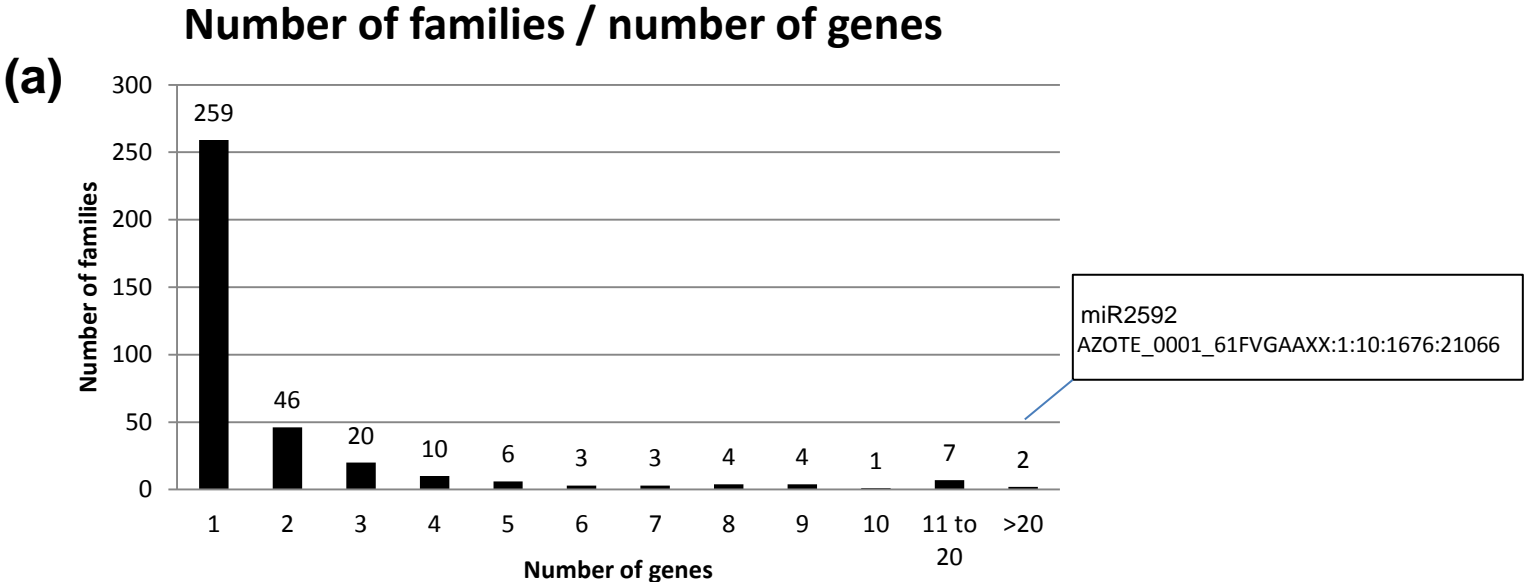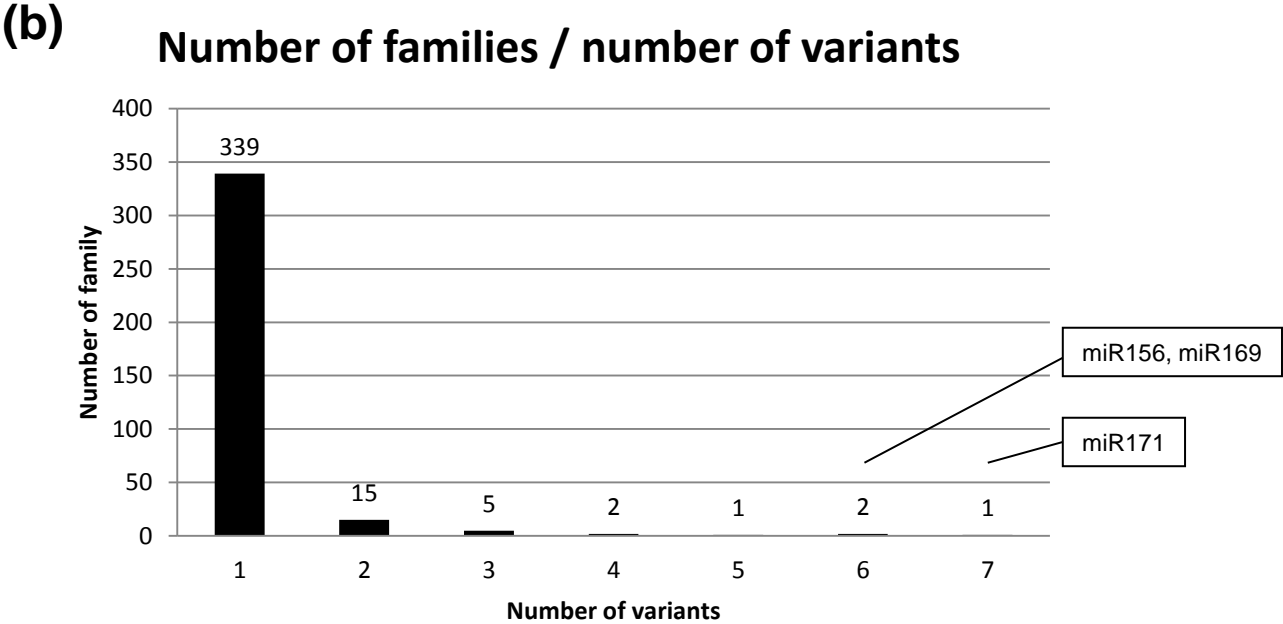

**Figure S3**

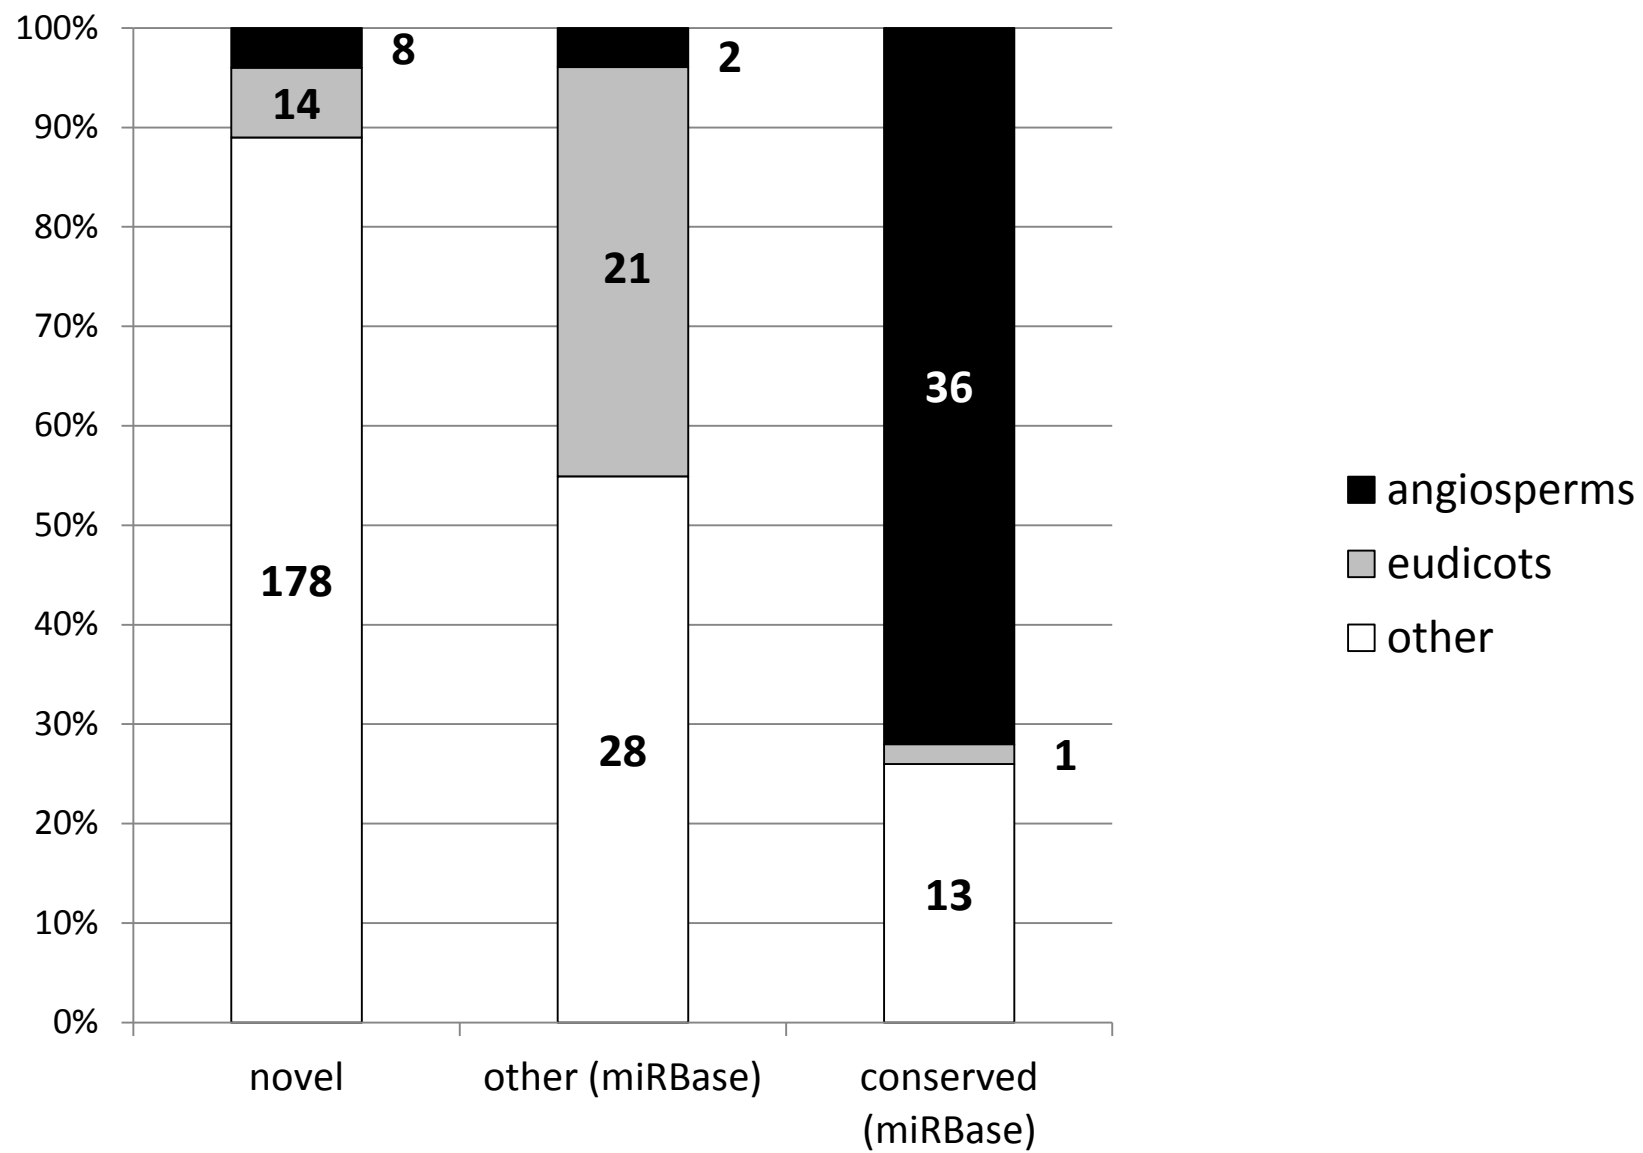

Figure S4

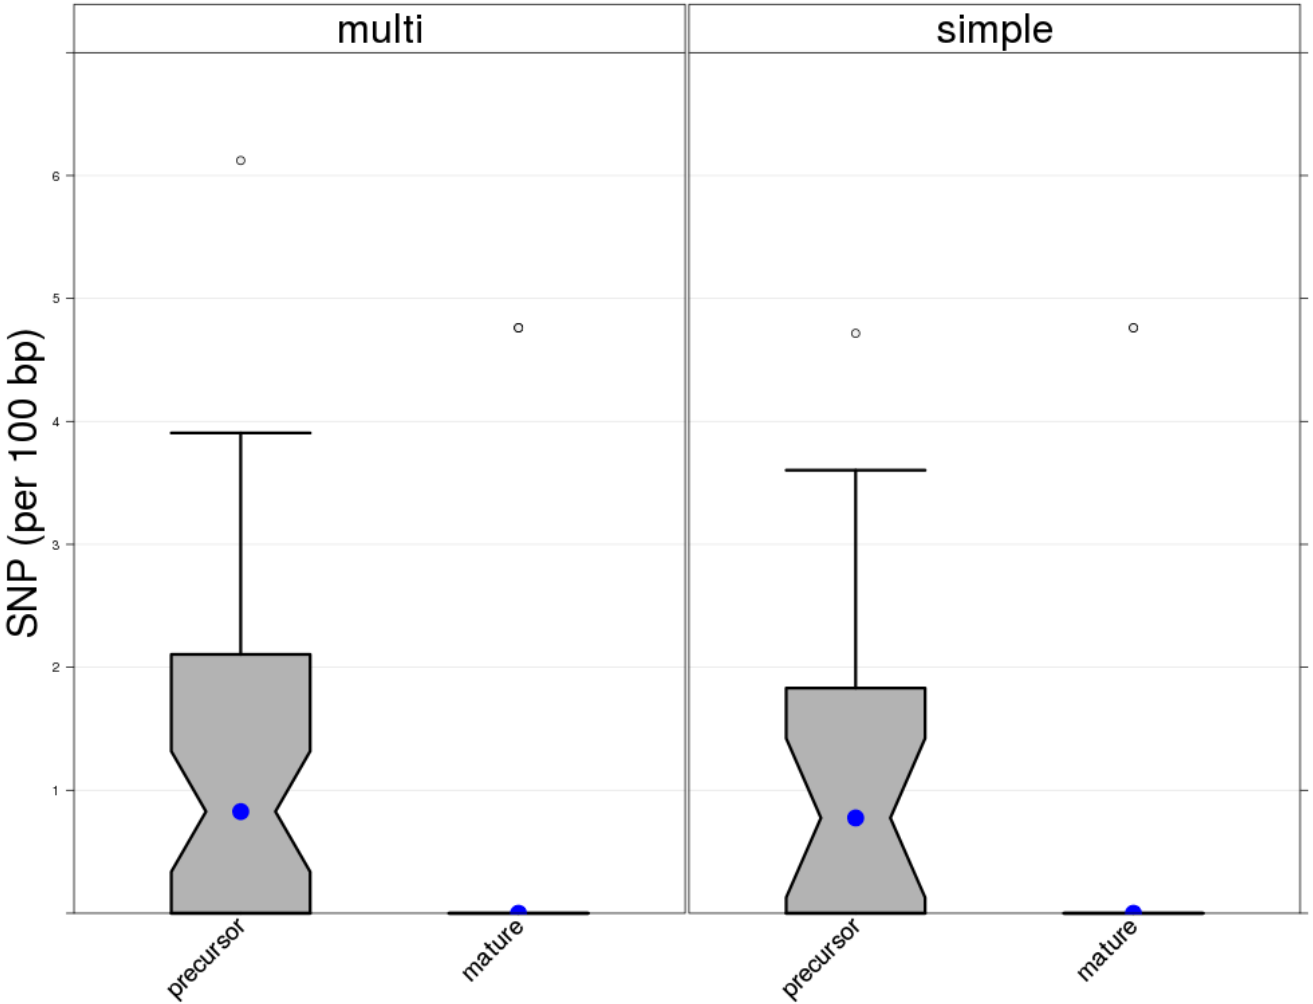

Figure S5

(a) Conserved miRNA targets

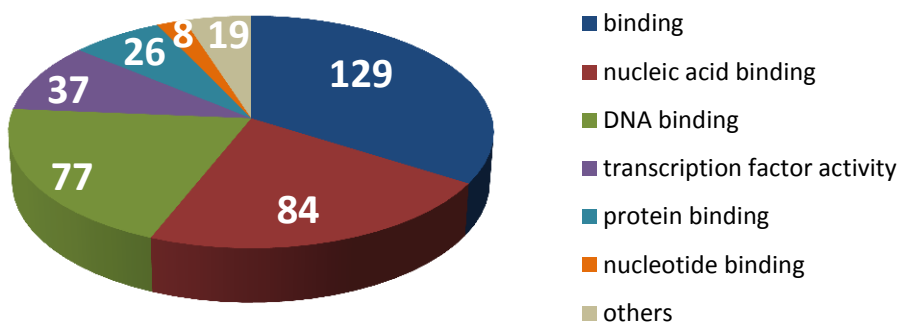

(b) Legume miRNA targets

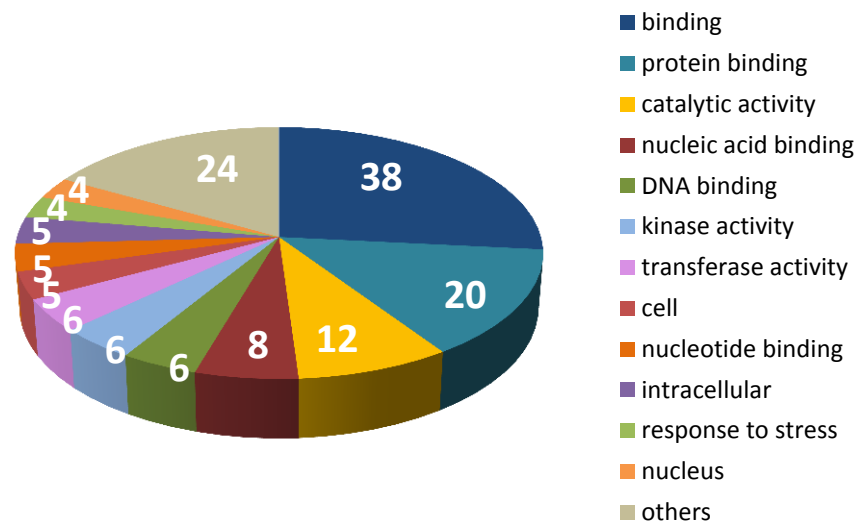

(c) Novel miRNA targets

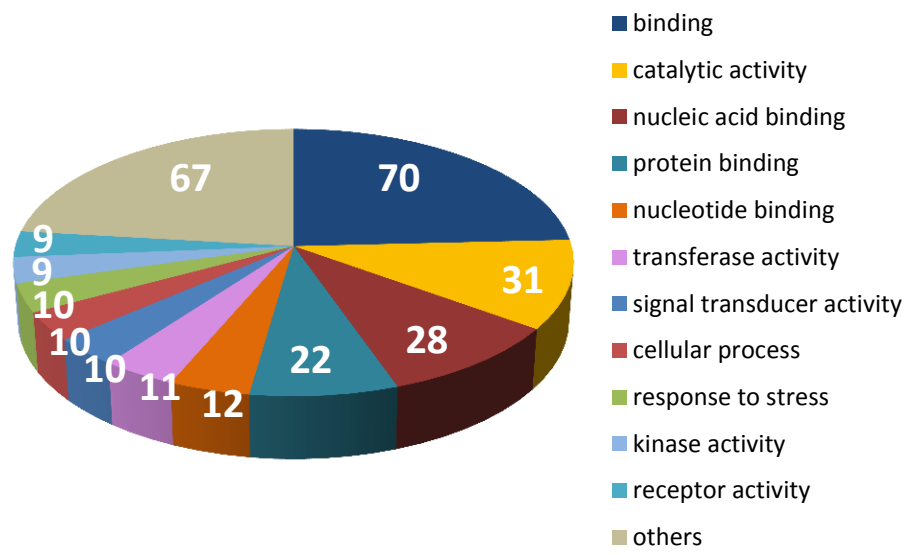

Figure S6  
(a)

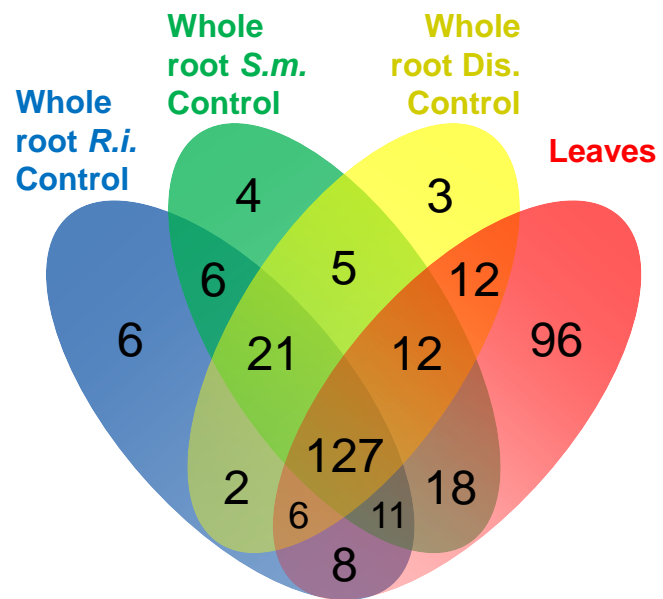

(b)

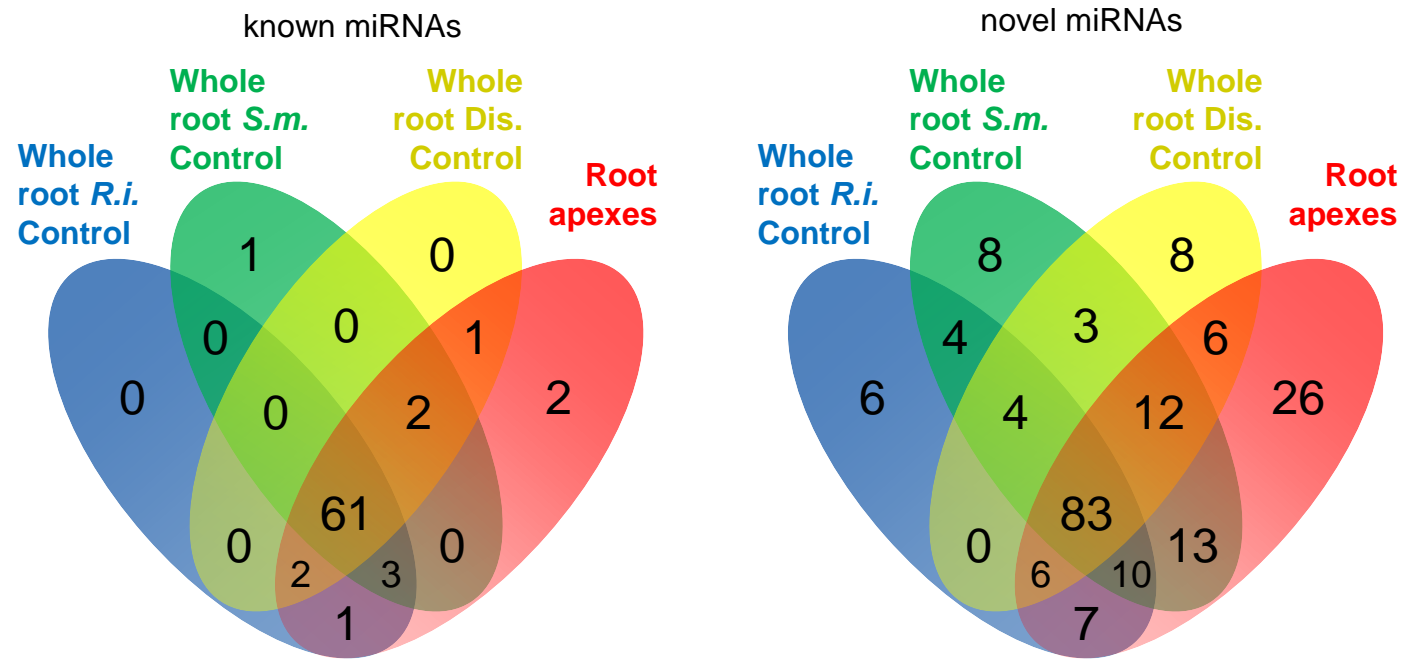

Figure S7

(a)

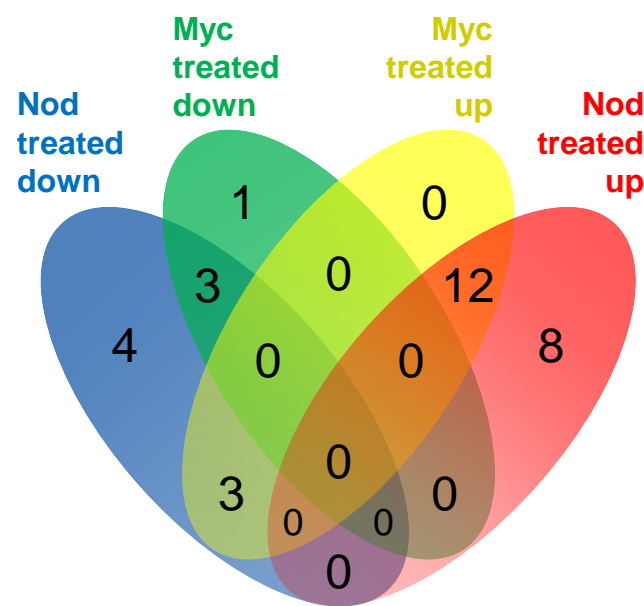

(b)

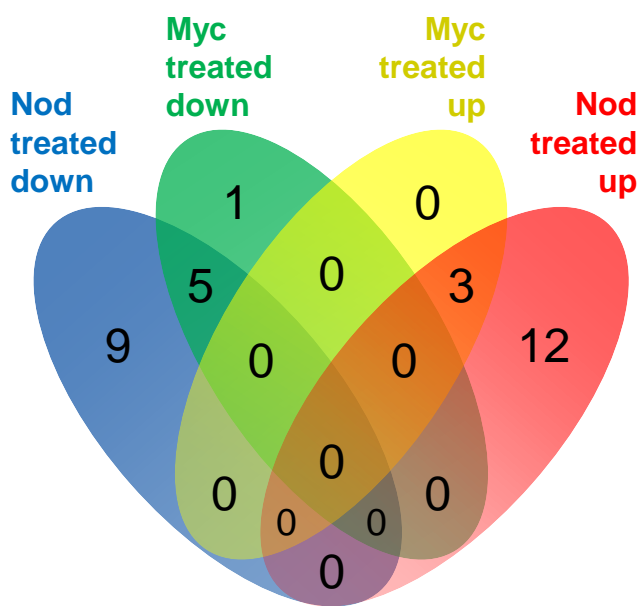

Figure S8

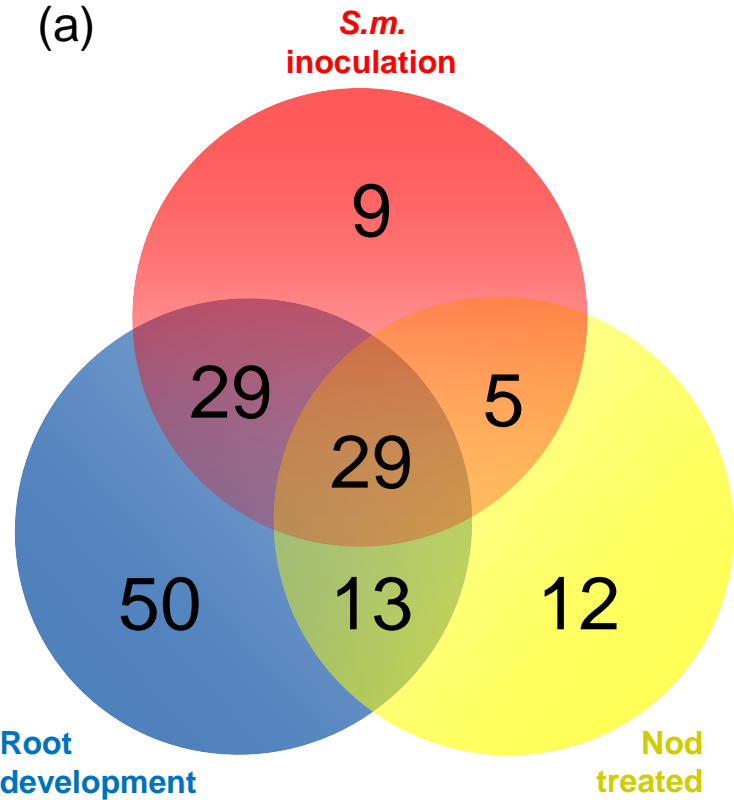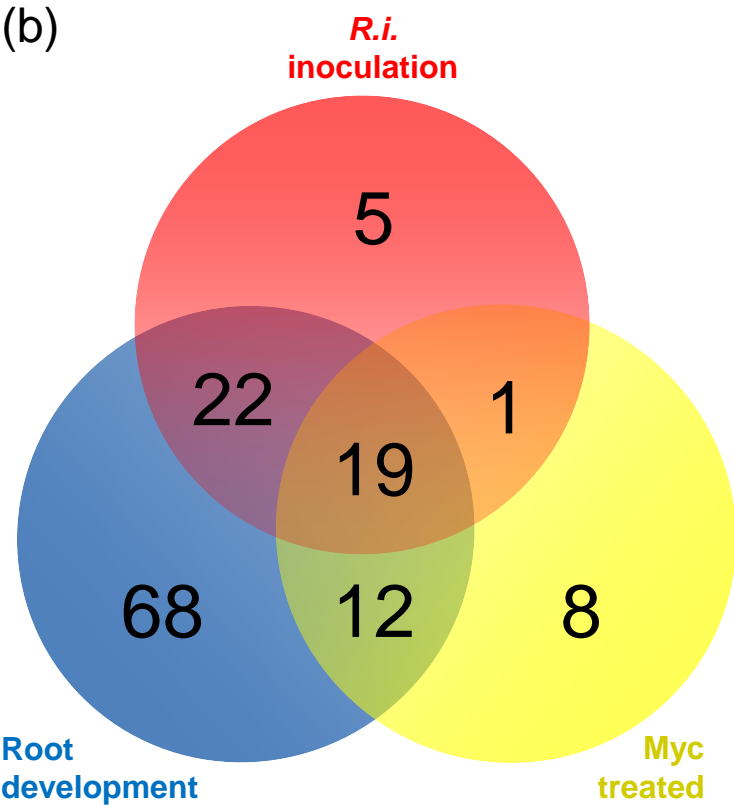

Figure S9

A

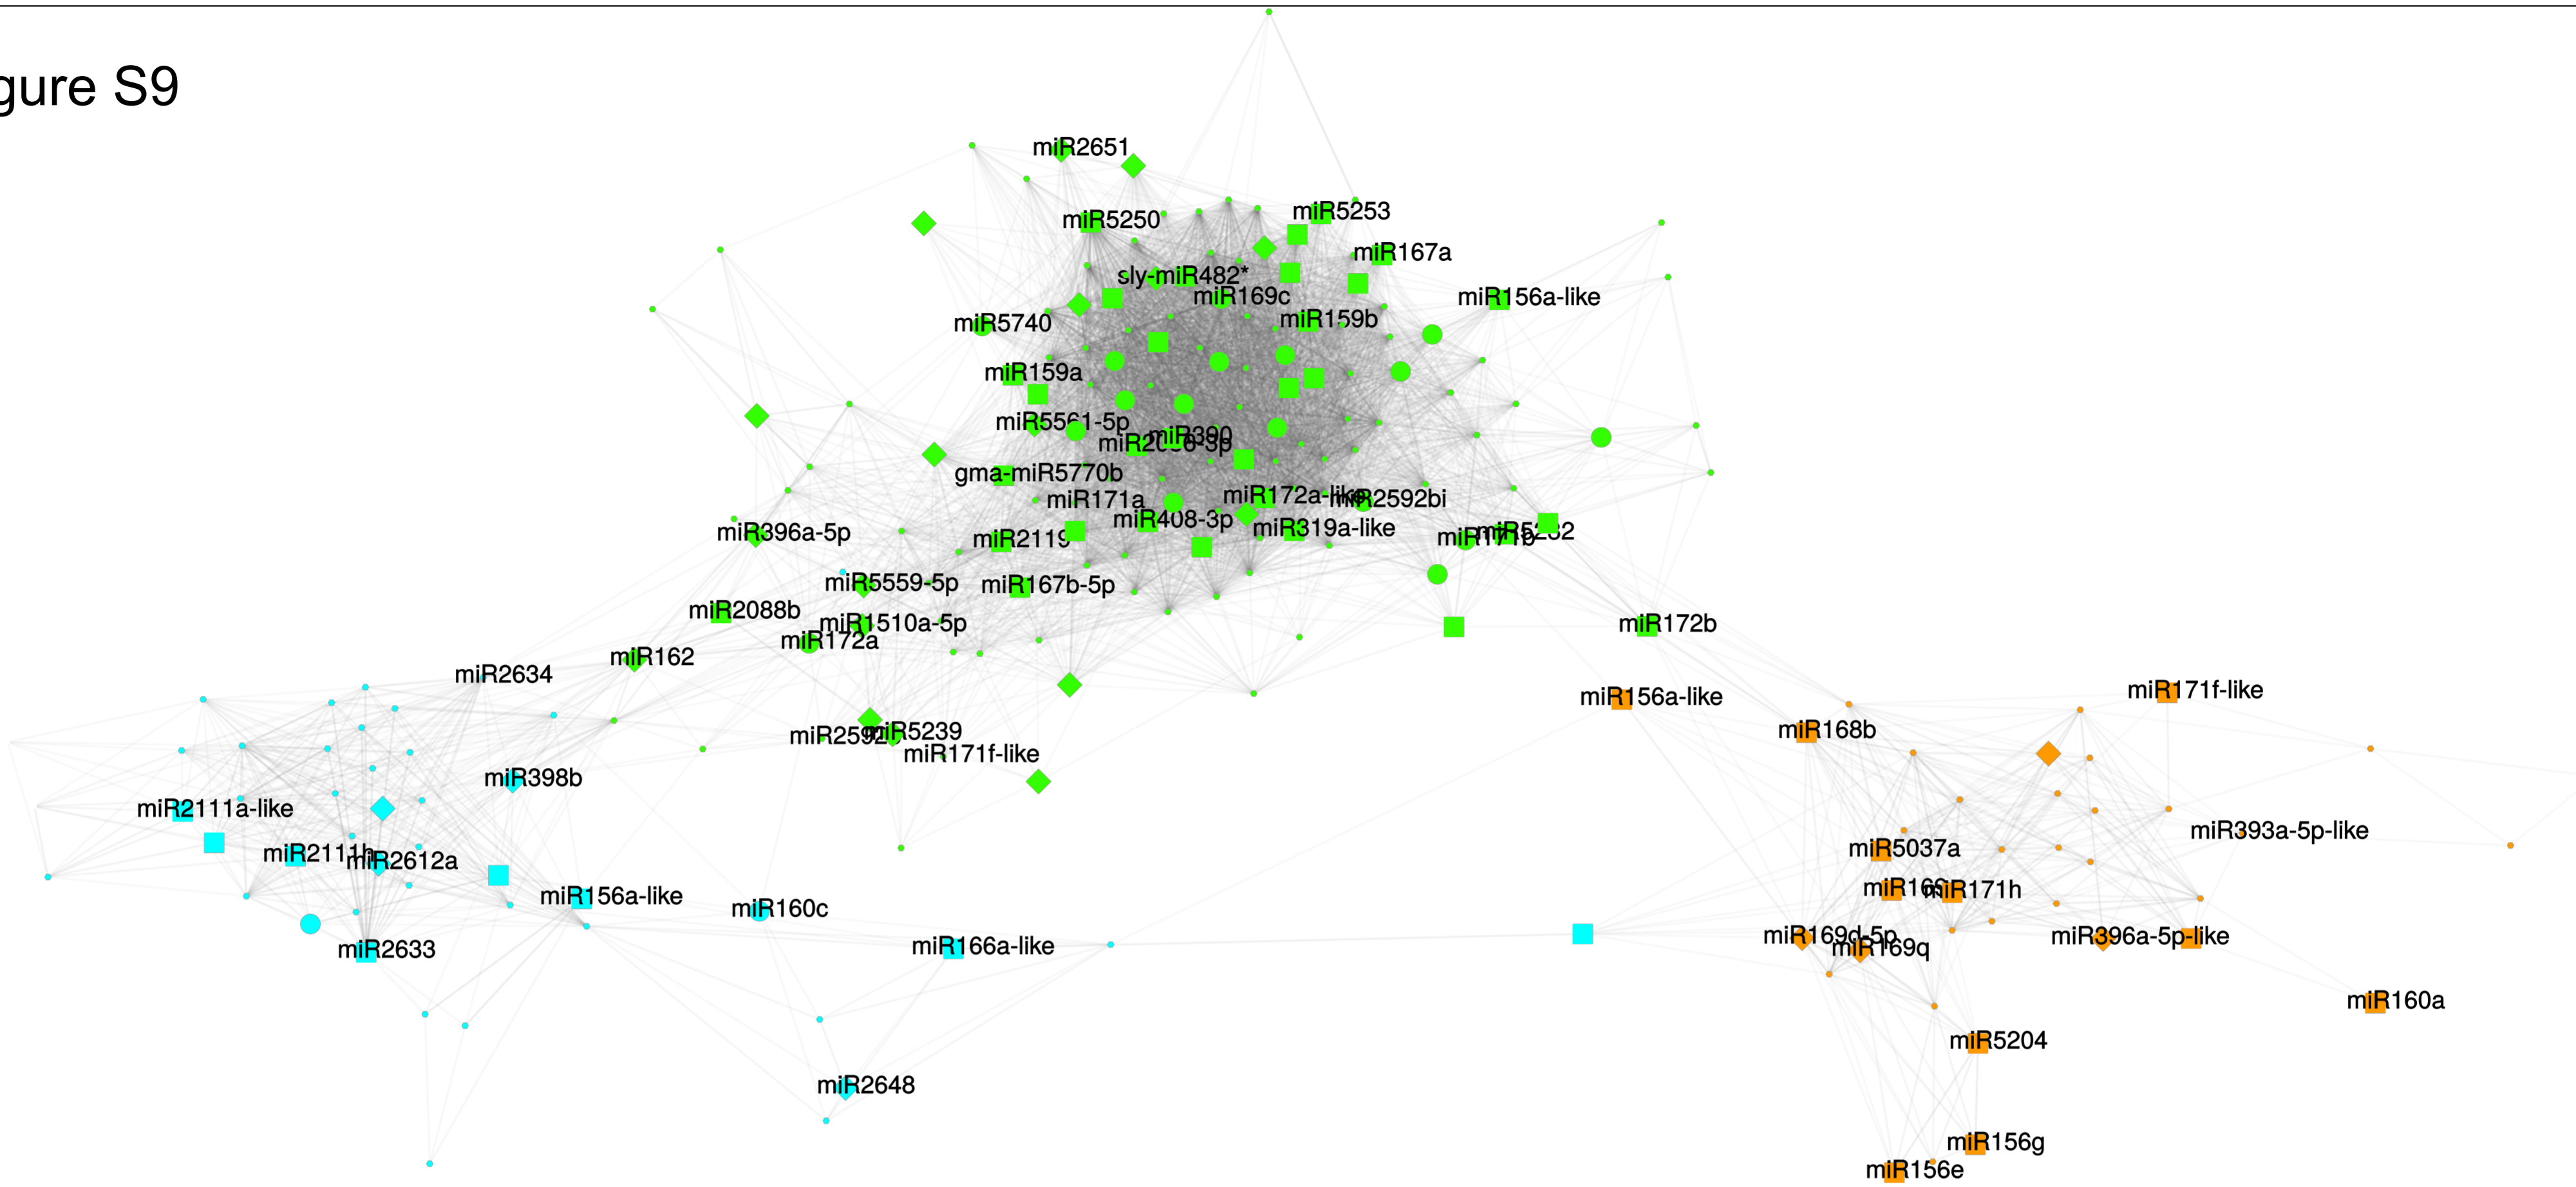

B

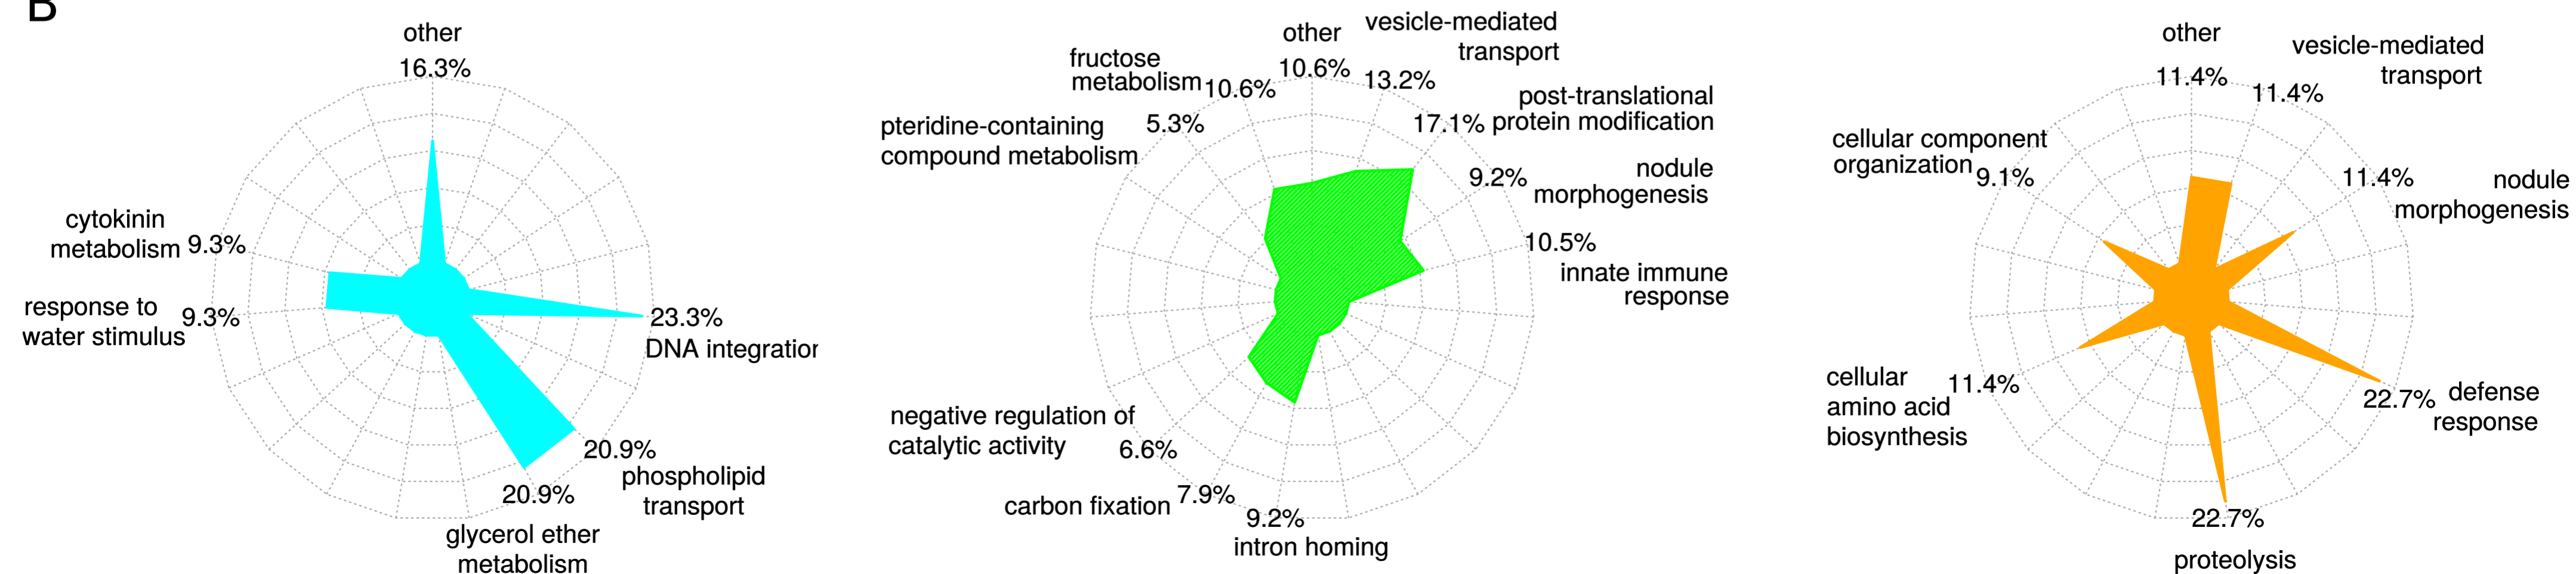

Supplement: Additional file 6: Figure S1 — Accumulation of conserved and novel miRNAs. Figure S2. Complexity of mtr-miRNA gene families. Figure S3. Distribution of the wide-spread miRNA class in the Eudicots, Angiosperms and other plants. Figure S4. Comparisons of the levels of polymorphisms of precursors and mature miRNAs from conserved miRNAs encoded in multiple (>2) or simple (<=2) loci. Figure S5. Pie charts of the functional annotation (Gene Ontology) distribution of miRNA targets. Figure S6. Venn diagrams of the miRNA expression distribution in leaves versus roots grown under different conditions. Figure S7. Venn diagrams of the miRNA expression distribution in roots treated with symbiotic signals (Nod and Myc LCOs). Figure S8. Venn diagrams of the comparison of miRNAs differentially expressed between symbiotic microbes, symbiotic-related signals and respective control roots. Figure S9. WGCNA co-expression network of miRNAs in response to root symbionts and pathogens. [file 13059_2014_457_MOESM6_ESM.pdf]
